# Supplementary material for: Associations between mental health disorder and management of physical chronic conditions in China: a pooled cross-sectional analysis
Source: PubMed Central journal article supplement (PMC7952541; doi:10.1038/s41598-021-85126-4), 2021-03-11
Supplement: 41598_2021_85126_MOESM1_ESM.pdf [file 41598_2021_85126_MOESM1_ESM.pdf]

**Associations between mental health disorder and management of physical chronic conditions in China: a pooled cross-sectional analysis**

**Zheng Zhang<sup>1\*</sup>, Grace Sum<sup>2</sup>, Vicky Mengqi Qin<sup>2</sup>, Yang Zhao<sup>3,4</sup>, Tilahun Nigatu Haregu<sup>4,5</sup>, Brian Oldenburg<sup>4,5</sup>, John Tayu Lee<sup>5,6</sup>**

<sup>1</sup> School of Population and Global Health, University of Melbourne, VIC, Australia

<sup>2</sup> Saw Swee Hock School of Public Health, National University of Singapore, Singapore

<sup>3</sup> The George Institute for Global Health at Peking University Health Science Centre, Beijing, China

<sup>4</sup> WHO collaborating Centre on Implementation Research for Prevention and Control of Noncommunicable Disease, Melbourne, VIC, Australia

<sup>5</sup> The Nossal Institute for Global Health, The University of Melbourne, Melbourne, VIC, Australia

<sup>6</sup> Department of Primary Care and Public Health, School of Public Health, Imperial College, London,

\*Correspondence to: zheng zhang [zhengz7@student.unimelb.edu.au](mailto:zhengz7@student.unimelb.edu.au)

Grace Sum [gracesum@u.nus.edu](mailto:gracesum@u.nus.edu)

Vicky Mengqi Qin [mq.qin@u.nus.edu](mailto:mq.qin@u.nus.edu)

Yang Zhao [xiyunjushi@163.com](mailto:xiyunjushi@163.com)

Tilahun Nigatu Haregu [haregu.t@unimelb.edu.au](mailto:haregu.t@unimelb.edu.au)

Brian Oldenburg [brian.oldenburg@unimelb.edu.au](mailto:brian.oldenburg@unimelb.edu.au)

John Tayu Lee [johntayulee@unimelb.edu.au](mailto:johntayulee@unimelb.edu.au)

Appendix graph 1: flow chart

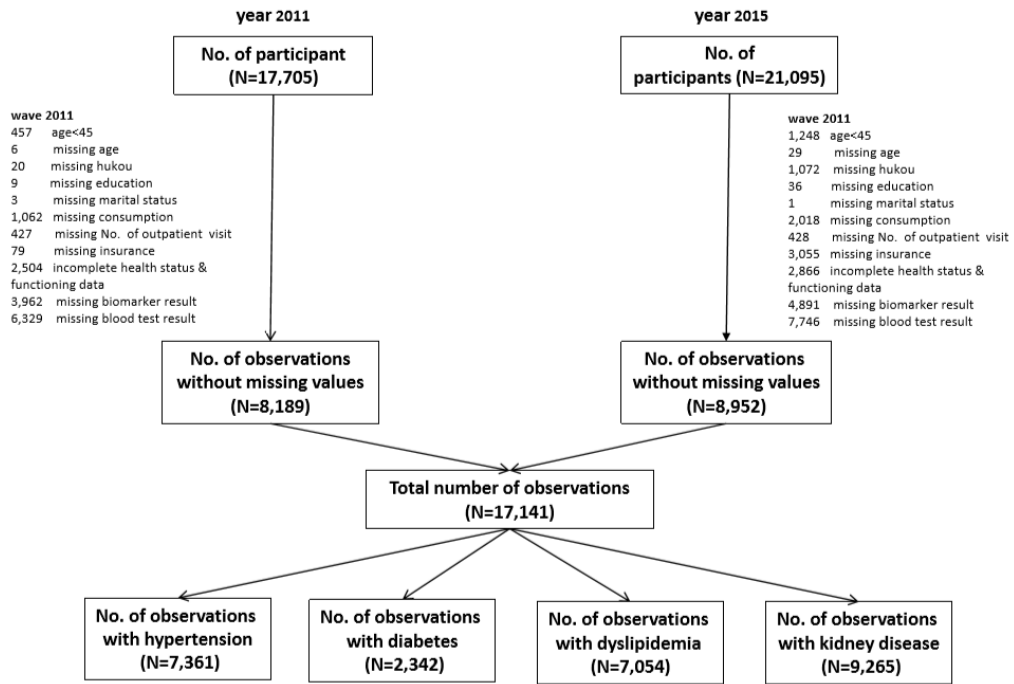

**Table 1a. Demographic characteristic of people with hypertension, self-report hypertension, and self-report hypertension treatment**

|                               | With hypertension<br>(N=7,361) |       | With self-report hypertension<br>(N=5,079) |       | With self-report hypertension treatment<br>(N=3,907) |       |  |
|-------------------------------|--------------------------------|-------|--------------------------------------------|-------|------------------------------------------------------|-------|--|
|                               | n                              | %     | n                                          | %     | n                                                    | %     |  |
| <b>Gender</b>                 |                                |       |                                            |       |                                                      |       |  |
| Male                          | 3,487                          | 47.37 | 2,316                                      | 45.60 | 1,728                                                | 44.23 |  |
| Female                        | 3,874                          | 52.63 | 2,763                                      | 54.40 | 2,179                                                | 55.77 |  |
| <b>Age</b>                    |                                |       |                                            |       |                                                      |       |  |
| 45-54                         | 1,653                          | 22.46 | 1,083                                      | 21.32 | 765                                                  | 19.58 |  |
| 55-64                         | 2,896                          | 39.34 | 2,066                                      | 40.68 | 1,600                                                | 40.95 |  |
| 65-74                         | 2,075                          | 28.19 | 1,458                                      | 28.71 | 1,164                                                | 29.79 |  |
| 75+                           | 737                            | 10.01 | 472                                        | 9.29  | 378                                                  | 9.67  |  |
| <b>Education</b>              |                                |       |                                            |       |                                                      |       |  |
| Middle school or low          | 5,223                          | 70.96 | 3,556                                      | 70.01 | 2,747                                                | 70.31 |  |
| High school/vocational school | 1,867                          | 25.36 | 1,320                                      | 25.99 | 995                                                  | 25.47 |  |
| College or above              | 271                            | 3.68  | 203                                        | 4.00  | 165                                                  | 4.22  |  |
| <b>Marital Status</b>         |                                |       |                                            |       |                                                      |       |  |
| Married                       | 6,290                          | 85.45 | 4,376                                      | 86.16 | 3,365                                                | 86.13 |  |
| Single                        | 1,071                          | 14.55 | 703                                        | 13.84 | 542                                                  | 13.87 |  |
| <b>Consumption level</b>      |                                |       |                                            |       |                                                      |       |  |
| Q1 (most deprived)            | 1,895                          | 25.74 | 1,206                                      | 23.74 | 936                                                  | 23.96 |  |
| Q2                            | 1,691                          | 22.97 | 1,140                                      | 22.45 | 864                                                  | 22.11 |  |
| Q3                            | 1,479                          | 20.09 | 1,057                                      | 20.81 | 820                                                  | 20.99 |  |
| Q4                            | 1,280                          | 17.39 | 909                                        | 17.90 | 689                                                  | 17.64 |  |
| Q5 (most affluent)            | 1,016                          | 13.80 | 767                                        | 15.10 | 598                                                  | 15.31 |  |
| <b>Insurance</b>              |                                |       |                                            |       |                                                      |       |  |
| No                            | 222                            | 3.02  | 134                                        | 2.64  | 95                                                   | 2.43  |  |
| UEMI                          | 838                            | 11.38 | 666                                        | 13.11 | 529                                                  | 13.54 |  |
| URMI                          | 376                            | 5.11  | 283                                        | 5.57  | 221                                                  | 5.66  |  |
| NCMI                          | 5,731                          | 77.86 | 3,860                                      | 76.00 | 2,953                                                | 75.58 |  |
| Others                        | 194                            | 2.64  | 136                                        | 2.68  | 109                                                  | 2.79  |  |
| <b>Residency</b>              |                                |       |                                            |       |                                                      |       |  |
| Rural                         | 4,317                          | 58.65 | 2,922                                      | 57.53 | 2,195                                                | 56.18 |  |
| Urban                         | 1,304                          | 17.71 | 1,017                                      | 20.02 | 820                                                  | 20.99 |  |
| Migration                     | 1,740                          | 23.64 | 1,140                                      | 22.45 | 892                                                  | 22.83 |  |
| <b>Region</b>                 |                                |       |                                            |       |                                                      |       |  |
| Eastern region                | 2,349                          | 31.91 | 1,647                                      | 32.43 | 1,302                                                | 33.32 |  |
| Central region                | 1,417                          | 19.25 | 980                                        | 19.30 | 748                                                  | 19.15 |  |
| Western region                | 3,407                          | 46.28 | 2,308                                      | 45.44 | 1,750                                                | 44.79 |  |
| North-eastern region          | 188                            | 2.55  | 144                                        | 2.84  | 107                                                  | 2.74  |  |

Note: UEMI=Urban Employee Medical Insurance; URMI=Urban Resident Medical Insurance; NCMI= New Cooperative Medical Insurance.

**Table 1b. Demographic characteristic of people with diabetes, with self-report diabetes, and self-report diabetes treatment**

|                                  | With diabetes<br>(N=2,342) |       | With self-report<br>diabetes<br>(N=1,297) |       | With self-report<br>diabetes treatment<br>(N=907) |       |  |
|----------------------------------|----------------------------|-------|-------------------------------------------|-------|---------------------------------------------------|-------|--|
|                                  | n                          | %     | n                                         | %     | n                                                 | %     |  |
| <b>Gender</b>                    |                            |       |                                           |       |                                                   |       |  |
| Male                             | 1,057                      | 45.13 | 536                                       | 41.33 | 385                                               | 42.45 |  |
| Female                           | 1,285                      | 54.87 | 761                                       | 58.67 | 522                                               | 57.55 |  |
| <b>Age</b>                       |                            |       |                                           |       |                                                   |       |  |
| 45-54                            | 593                        | 25.32 | 291                                       | 22.44 | 194                                               | 21.39 |  |
| 55-64                            | 974                        | 41.59 | 550                                       | 42.41 | 396                                               | 43.66 |  |
| 65-74                            | 597                        | 25.49 | 359                                       | 27.68 | 249                                               | 27.45 |  |
| 75+                              | 178                        | 7.60  | 97                                        | 7.48  | 68                                                | 7.50  |  |
| <b>Education</b>                 |                            |       |                                           |       |                                                   |       |  |
| Middle school or low             | 1,566                      | 66.87 | 844                                       | 65.07 | 589                                               | 64.94 |  |
| High school/vocational<br>school | 647                        | 27.63 | 365                                       | 28.14 | 252                                               | 27.78 |  |
| College or above                 | 129                        | 5.51  | 88                                        | 6.78  | 66                                                | 7.28  |  |
| <b>Marital Status</b>            |                            |       |                                           |       |                                                   |       |  |
| Married                          | 2,075                      | 88.60 | 1,153                                     | 88.90 | 808                                               | 89.08 |  |
| Single                           | 267                        | 11.40 | 144                                       | 11.10 | 99                                                | 10.92 |  |
| <b>Consumption level</b>         |                            |       |                                           |       |                                                   |       |  |
| Q1 (most deprived)               | 515                        | 21.99 | 244                                       | 18.81 | 166                                               | 18.30 |  |
| Q2                               | 526                        | 22.46 | 276                                       | 21.28 | 190                                               | 20.95 |  |
| Q3                               | 482                        | 20.58 | 266                                       | 20.51 | 179                                               | 19.74 |  |
| Q4                               | 437                        | 18.66 | 272                                       | 20.97 | 208                                               | 22.93 |  |
| Q5 (most affluent)               | 382                        | 16.31 | 239                                       | 18.43 | 164                                               | 18.08 |  |
| <b>Insurance</b>                 |                            |       |                                           |       |                                                   |       |  |
| No                               | 81                         | 3.46  | 39                                        | 3.01  | 30                                                | 3.31  |  |
| UEMI                             | 328                        | 14.01 | 231                                       | 17.81 | 170                                               | 18.74 |  |
| URMI                             | 143                        | 6.11  | 92                                        | 7.09  | 64                                                | 7.06  |  |
| NCMI                             | 1,717                      | 73.31 | 892                                       | 68.77 | 607                                               | 66.92 |  |
| Others                           | 73                         | 3.12  | 43                                        | 3.32  | 36                                                | 3.97  |  |
| <b>Residency</b>                 |                            |       |                                           |       |                                                   |       |  |
| Rural                            | 1,261                      | 53.84 | 633                                       | 48.80 | 424                                               | 46.75 |  |
| Urban                            | 537                        | 22.93 | 363                                       | 27.99 | 268                                               | 29.55 |  |
| Migration                        | 544                        | 23.23 | 301                                       | 23.21 | 215                                               | 23.70 |  |
| <b>Region</b>                    |                            |       |                                           |       |                                                   |       |  |
| Eastern region                   | 769                        | 32.84 | 448                                       | 34.54 | 310                                               | 34.18 |  |

|                             |       |       |     |       |     |       |
|-----------------------------|-------|-------|-----|-------|-----|-------|
| <b>Central region</b>       | 378   | 16.14 | 197 | 15.19 | 142 | 15.66 |
| <b>Western region</b>       | 1,136 | 48.51 | 609 | 46.95 | 423 | 46.64 |
| <b>North-eastern region</b> | 59    | 2.52  | 43  | 3.32  | 32  | 3.53  |

Note: UEMI=Urban Employee Medical Insurance; URMI=Urban Resident Medical Insurance; NCMI= New Cooperative Medical Insurance.

**Table 1c. Demographic characteristic of people with dyslipidemia, with self-report dyslipidemia, and self-report dyslipidemia treatment**

|                                  | With dyslipidemia<br>(N=7,054) |       | With self-report<br>dyslipidemia<br>(N=2,142) |       | With self-report<br>dyslipidemia<br>treatment (N=1,219) |       |  |
|----------------------------------|--------------------------------|-------|-----------------------------------------------|-------|---------------------------------------------------------|-------|--|
|                                  | n                              | %     | n                                             | %     | n                                                       | %     |  |
| <b>Gender</b>                    |                                |       |                                               |       |                                                         |       |  |
| Male                             | 3,296                          | 46.73 | 963                                           | 44.96 | 542                                                     | 44.46 |  |
| Female                           | 3,758                          | 53.27 | 1,179                                         | 55.04 | 677                                                     | 55.54 |  |
| <b>Age</b>                       |                                |       |                                               |       |                                                         |       |  |
| 45-54                            | 2,211                          | 31.34 | 564                                           | 26.33 | 298                                                     | 24.45 |  |
| 55-64                            | 2,883                          | 40.87 | 924                                           | 43.14 | 556                                                     | 45.61 |  |
| 65-74                            | 1,521                          | 21.56 | 538                                           | 25.12 | 304                                                     | 24.94 |  |
| 75+                              | 439                            | 6.22  | 116                                           | 5.42  | 61                                                      | 5.00  |  |
| <b>Education</b>                 |                                |       |                                               |       |                                                         |       |  |
| Middle school or low             | 4,608                          | 65.32 | 1,272                                         | 59.38 | 775                                                     | 63.58 |  |
| High school/vocational<br>school | 2,128                          | 30.17 | 710                                           | 33.15 | 365                                                     | 29.94 |  |
| College or above                 | 318                            | 4.51  | 160                                           | 7.47  | 79                                                      | 6.48  |  |
| <b>Marital Status</b>            |                                |       |                                               |       |                                                         |       |  |
| Married                          | 6,270                          | 88.89 | 1,913                                         | 89.31 | 1,087                                                   | 89.17 |  |
| Single                           | 784                            | 11.11 | 229                                           | 10.69 | 132                                                     | 10.83 |  |
| <b>Consumption level</b>         |                                |       |                                               |       |                                                         |       |  |
| Q1 (most deprived)               | 1,505                          | 21.34 | 388                                           | 18.11 | 226                                                     | 18.54 |  |
| Q2                               | 1,582                          | 22.43 | 456                                           | 21.29 | 271                                                     | 22.23 |  |
| Q3                               | 1,432                          | 20.30 | 419                                           | 19.56 | 240                                                     | 19.69 |  |
| Q4                               | 1,356                          | 19.22 | 451                                           | 21.06 | 250                                                     | 20.51 |  |
| Q5 (most affluent)               | 1,179                          | 16.71 | 428                                           | 19.98 | 232                                                     | 19.03 |  |
| <b>Insurance</b>                 |                                |       |                                               |       |                                                         |       |  |
| No                               | 214                            | 3.03  | 40                                            | 1.87  | 24                                                      | 1.97  |  |
| UEMI                             | 902                            | 12.79 | 429                                           | 20.03 | 209                                                     | 17.15 |  |
| URMI                             | 380                            | 5.39  | 140                                           | 6.54  | 69                                                      | 5.66  |  |
| NCMI                             | 5,352                          | 75.87 | 1,466                                         | 68.44 | 881                                                     | 72.27 |  |
| Others                           | 206                            | 2.92  | 67                                            | 3.13  | 36                                                      | 2.95  |  |
| <b>Residency</b>                 |                                |       |                                               |       |                                                         |       |  |
| Rural                            | 3,928                          | 55.68 | 1,053                                         | 49.16 | 627                                                     | 51.44 |  |
| Urban                            | 1,412                          | 20.02 | 599                                           | 27.96 | 298                                                     | 24.45 |  |
| Migration                        | 1,714                          | 24.30 | 490                                           | 22.88 | 294                                                     | 24.12 |  |

| Region               |       |       |     |       |     |       |
|----------------------|-------|-------|-----|-------|-----|-------|
| Eastern region       | 2,207 | 31.29 | 710 | 33.15 | 402 | 32.98 |
| Central region       | 1,412 | 20.02 | 388 | 18.11 | 232 | 19.03 |
| Western region       | 3,249 | 46.06 | 974 | 45.47 | 548 | 44.95 |
| North-eastern region | 186   | 2.64  | 70  | 3.27  | 37  | 3.04  |

Note: UEMI=Urban Employee Medical Insurance; URMI=Urban Resident Medical Insurance; NCMI= New Cooperative Medical Insurance.

**Table 1d. Demographic characteristic of people with kidney disease, with self-report kidney disease, and with self-report kidney disease treatment**

|                               | With kidney disease<br>(N=9,265) |       | With self-report kidney disease<br>(N=1,184) |       | With self-report kidney disease treatment<br>(N=611) |       |
|-------------------------------|----------------------------------|-------|----------------------------------------------|-------|------------------------------------------------------|-------|
|                               | n                                | %     | n                                            | %     | n                                                    | %     |
| <b>Gender</b>                 |                                  |       |                                              |       |                                                      |       |
| Male                          | 4,277                            | 46.16 | 634                                          | 53.55 | 333                                                  | 54.50 |
| Female                        | 4,988                            | 53.84 | 550                                          | 46.45 | 278                                                  | 45.50 |
| <b>Age</b>                    |                                  |       |                                              |       |                                                      |       |
| 45-54                         | 2,295                            | 24.77 | 338                                          | 28.55 | 177                                                  | 28.97 |
| 55-64                         | 3,600                            | 38.86 | 481                                          | 40.63 | 251                                                  | 41.08 |
| 65-74                         | 2,458                            | 26.53 | 284                                          | 23.99 | 142                                                  | 23.24 |
| 75+                           | 912                              | 9.84  | 81                                           | 6.84  | 41                                                   | 6.71  |
| <b>Education</b>              |                                  |       |                                              |       |                                                      |       |
| Middle school or low          | 6,476                            | 69.90 | 807                                          | 68.16 | 414                                                  | 67.76 |
| High school/vocational school | 2,439                            | 26.32 | 333                                          | 28.13 | 175                                                  | 28.64 |
| College or above              | 350                              | 3.78  | 44                                           | 3.72  | 22                                                   | 3.60  |
| <b>Marital Status</b>         |                                  |       |                                              |       |                                                      |       |
| Married                       | 7,989                            | 86.23 | 1,055                                        | 89.10 | 536                                                  | 87.73 |
| Single                        | 1,276                            | 13.77 | 129                                          | 10.90 | 75                                                   | 12.27 |
| <b>Consumption level</b>      |                                  |       |                                              |       |                                                      |       |
| Q1 (most deprived)            | 2,152                            | 23.23 | 232                                          | 19.59 | 113                                                  | 18.49 |
| Q2                            | 2,051                            | 22.14 | 269                                          | 22.72 | 143                                                  | 23.40 |
| Q3                            | 1,903                            | 20.54 | 250                                          | 21.11 | 125                                                  | 20.46 |
| Q4                            | 1,734                            | 18.72 | 214                                          | 18.07 | 107                                                  | 17.51 |
| Q5 (most affluent)            | 1,425                            | 15.38 | 219                                          | 18.50 | 123                                                  | 20.13 |
| <b>Insurance</b>              |                                  |       |                                              |       |                                                      |       |
| No                            | 271                              | 2.92  | 23                                           | 1.94  | 10                                                   | 1.64  |
| UEMI                          | 1,118                            | 12.07 | 138                                          | 11.66 | 60                                                   | 9.82  |
| URMI                          | 460                              | 4.96  | 80                                           | 6.76  | 45                                                   | 7.36  |
| NCMI                          | 7,156                            | 77.24 | 909                                          | 76.77 | 477                                                  | 78.07 |
| Others                        | 260                              | 2.81  | 34                                           | 2.87  | 19                                                   | 3.11  |
| <b>Residency</b>              |                                  |       |                                              |       |                                                      |       |

|               |                             |       |       |     |       |     |       |
|---------------|-----------------------------|-------|-------|-----|-------|-----|-------|
|               | <b>Rural</b>                | 5,431 | 58.62 | 700 | 59.12 | 357 | 58.43 |
|               | <b>Urban</b>                | 1,692 | 18.26 | 212 | 17.91 | 101 | 16.53 |
|               | <b>Migration</b>            | 2,142 | 23.12 | 272 | 22.97 | 153 | 25.04 |
| <b>Region</b> |                             |       |       |     |       |     |       |
|               | <b>Eastern region</b>       | 2,748 | 29.66 | 331 | 27.96 | 142 | 23.24 |
|               | <b>Central region</b>       | 1,697 | 18.32 | 292 | 24.66 | 181 | 29.62 |
|               | <b>Western region</b>       | 4,577 | 49.40 | 518 | 43.75 | 267 | 43.70 |
|               | <b>North-eastern region</b> | 243   | 2.62  | 43  | 3.63  | 21  | 3.44  |

Note: UEMI=Urban Employee Medical Insurance; URM=Urban Resident Medical Insurance; NCM= New Cooperative Medical Insurance.

**Table 2a. univariate regression result of hypertension awareness**

| Hypertension awareness        | Odds Ratio | Std.Err | Z     | P> Z  | 95% conf. Interval |      |
|-------------------------------|------------|---------|-------|-------|--------------------|------|
| <b>Mental health disorder</b> |            |         |       |       |                    |      |
| yes                           | 1.94       | 0.24    | 5.45  | 0.000 | 1.53               | 2.46 |
| _cons                         | 4.10       | 0.41    | 14.00 | 0.000 | 3.36               | 4.99 |

Note: Std.Err= standard error; conf.Interval= confidence interval.

**Table 2b. multivariate regression result of hypertension awareness**

| Hypertension awareness               | Odds Ratio | Std.Err | Z     | P> Z  | 95% conf. Interval |       |
|--------------------------------------|------------|---------|-------|-------|--------------------|-------|
| <b>Mental health disorder</b>        |            |         |       |       |                    |       |
| yes                                  | 1.31       | 0.19    | 1.90  | 0.057 | 0.99               | 1.74  |
| <b>Year</b>                          |            |         |       |       |                    |       |
| 2015                                 | 3.63       | 0.46    | 10.25 | 0.000 | 2.84               | 4.64  |
| <b>No. of physical comorbidities</b> |            |         |       |       |                    |       |
| One                                  | 3.84       | 0.60    | 8.59  | 0.000 | 2.82               | 5.21  |
| Two                                  | 9.52       | 1.90    | 11.28 | 0.000 | 6.43               | 14.08 |
| Three                                | 21.32      | 5.63    | 11.59 | 0.000 | 12.71              | 35.77 |
| Four or more                         | 42.20      | 13.48   | 11.71 | 0.000 | 22.56              | 78.93 |
| <b>Gender</b>                        |            |         |       |       |                    |       |
| Female                               | 1.81       | 0.25    | 4.36  | 0.000 | 1.39               | 2.37  |
| <b>Education level</b>               |            |         |       |       |                    |       |
| Middle or high school                | 1.29       | 0.22    | 1.48  | 0.138 | 0.92               | 1.79  |
| College or above                     | 1.03       | 0.40    | 0.09  | 0.932 | 0.48               | 2.21  |
| <b>Marital status</b>                |            |         |       |       |                    |       |
| Not married                          | 0.73       | 0.14    | -1.65 | 0.099 | 0.51               | 1.06  |
| <b>Age</b>                           |            |         |       |       |                    |       |
| 55-64                                | 1.72       | 0.28    | 3.29  | 0.001 | 1.24               | 2.37  |
| 65-74                                | 1.37       | 0.26    | 1.70  | 0.088 | 0.95               | 1.98  |
| 75+                                  | 1.01       | 0.25    | 0.02  | 0.981 | 0.62               | 1.64  |
| <b>Consumption level</b>             |            |         |       |       |                    |       |

|                                |      |      |       |       |      |      |
|--------------------------------|------|------|-------|-------|------|------|
| <b>Q2</b>                      | 1.13 | 0.19 | 0.75  | 0.451 | 0.82 | 1.57 |
| <b>Q3</b>                      | 1.54 | 0.28 | 2.43  | 0.015 | 1.09 | 2.19 |
| <b>Q4</b>                      | 1.27 | 0.24 | 1.24  | 0.216 | 0.87 | 1.85 |
| <b>Q5 (most affluent)</b>      | 1.86 | 0.40 | 2.85  | 0.004 | 1.21 | 2.84 |
| <b>Insurance</b>               |      |      |       |       |      |      |
| <b>UEMI</b>                    | 1.87 | 0.78 | 1.51  | 0.131 | 0.83 | 4.24 |
| <b>URMI</b>                    | 1.15 | 0.53 | 0.30  | 0.762 | 0.47 | 2.82 |
| <b>NCMI</b>                    | 1.12 | 0.38 | 0.33  | 0.743 | 0.57 | 2.19 |
| <b>Others</b>                  | 1.54 | 0.78 | 0.86  | 0.391 | 0.57 | 4.15 |
| <b>Residency</b>               |      |      |       |       |      |      |
| <b>Urban</b>                   | 1.95 | 0.58 | 2.27  | 0.023 | 1.10 | 3.48 |
| <b>Migrate</b>                 | 0.83 | 0.16 | -0.98 | 0.326 | 0.57 | 1.20 |
| <b>No. of outpatient visit</b> | 1.24 | 0.07 | 3.78  | 0.000 | 1.11 | 1.38 |
| <b>Region</b>                  |      |      |       |       |      |      |
| <b>Central</b>                 | 0.89 | 0.22 | -0.50 | 0.618 | 0.55 | 1.43 |
| <b>Western</b>                 | 0.71 | 0.14 | -1.77 | 0.077 | 0.49 | 1.04 |
| <b>North-east</b>              | 1.34 | 0.73 | 0.53  | 0.594 | 0.46 | 3.88 |
| <b>_cons</b>                   | 0.24 | 0.10 | -3.41 | 0.001 | 0.10 | 0.54 |

Note: UEMI=Urban Employee Medical Insurance; URMI=Urban Resident Medical Insurance; NCMI= New Cooperative Medical Insurance; Std.Err= standard error; conf.Interval= confidence interval.

**Table 2c. univariate regression result of hypertension treated**

| Hypertension treated          | Odds Ratio | Std.Err | Z     | P> Z  | 95% conf. Interval |
|-------------------------------|------------|---------|-------|-------|--------------------|
| <b>Mental health disorder</b> |            |         |       |       |                    |
| <b>yes</b>                    | 1.57       | 0.20    | 3.59  | 0.000 | 1.23 2.01          |
| <b>_cons</b>                  | 6.34       | 0.82    | 14.33 | 0.000 | 4.92 8.15          |

Note: Std.Err= standard error; conf.Interval= confidence interval.

**Table 2d. multivariate regression result of hypertension treated**

| Hypertension treated                 | Odds Ratio | Std.Err | Z    | P> Z  | 95% conf. Interval |
|--------------------------------------|------------|---------|------|-------|--------------------|
| <b>Mental health disorder</b>        |            |         |      |       |                    |
| <b>Yes</b>                           | 1.32       | 0.17    | 2.13 | 0.033 | 1.02 1.71          |
| <b>Year</b>                          |            |         |      |       |                    |
| <b>2015</b>                          | 1.01       | 0.11    | 0.10 | 0.920 | 0.82 1.24          |
| <b>No. of physical comorbidities</b> |            |         |      |       |                    |
| <b>One</b>                           | 1.23       | 0.18    | 1.41 | 0.158 | 0.92 1.64          |
| <b>Two</b>                           | 1.62       | 0.27    | 2.92 | 0.004 | 1.17 2.24          |
| <b>Three</b>                         | 1.74       | 0.34    | 2.88 | 0.004 | 1.19 2.55          |
| <b>Four and more</b>                 | 2.89       | 0.64    | 4.82 | 0.000 | 1.88 4.46          |
| <b>Gender</b>                        |            |         |      |       |                    |
| <b>Female</b>                        | 1.54       | 0.19    | 3.59 | 0.000 | 1.22 1.95          |



|                              |      |      |       |       |      |      |
|------------------------------|------|------|-------|-------|------|------|
| <b>Education level</b>       |      |      |       |       |      |      |
| <b>Middle or high school</b> | 0.99 | 0.14 | -0.06 | 0.951 | 0.74 | 1.32 |
| <b>College or above</b>      | 1.55 | 0.52 | 1.29  | 0.197 | 0.80 | 2.99 |
| <b>Marital status</b>        |      |      |       |       |      |      |
| <b>Not married</b>           | 0.82 | 0.14 | -1.14 | 0.255 | 0.58 | 1.15 |
| <b>Age</b>                   |      |      |       |       |      |      |
| <b>55-64</b>                 | 1.87 | 0.28 | 4.19  | 0.000 | 1.40 | 2.51 |
| <b>65-74</b>                 | 2.48 | 0.43 | 5.18  | 0.000 | 1.76 | 3.49 |
| <b>75+</b>                   | 2.86 | 0.70 | 4.27  | 0.000 | 1.76 | 4.63 |
| <b>Consumption level</b>     |      |      |       |       |      |      |
| <b>Q2</b>                    | 0.78 | 0.12 | -1.53 | 0.125 | 0.57 | 1.07 |
| <b>Q3</b>                    | 0.94 | 0.16 | -0.35 | 0.729 | 0.68 | 1.31 |
| <b>Q4</b>                    | 0.82 | 0.15 | -1.12 | 0.263 | 0.58 | 1.16 |
| <b>Q5 (most affluent)</b>    | 1.01 | 0.19 | 0.03  | 0.979 | 0.69 | 1.47 |
| <b>Insurance</b>             |      |      |       |       |      |      |
| <b>UEMI</b>                  | 1.32 | 0.51 | 0.73  | 0.464 | 0.62 | 2.81 |
| <b>URMI</b>                  | 1.22 | 0.50 | 0.49  | 0.627 | 0.55 | 2.73 |
| <b>NCMI</b>                  | 1.95 | 0.66 | 1.98  | 0.048 | 1.01 | 3.78 |
| <b>Others</b>                | 1.78 | 0.85 | 1.20  | 0.229 | 0.70 | 4.56 |
| <b>Residency</b>             |      |      |       |       |      |      |
| <b>Urban</b>                 | 2.27 | 0.60 | 3.10  | 0.002 | 1.35 | 3.80 |
| <b>Migrate</b>               | 1.64 | 0.29 | 2.78  | 0.005 | 1.16 | 2.33 |
| <b>No. of outpatient</b>     | 1.04 | 0.04 | 1.01  | 0.310 | 0.97 | 1.12 |
| <b>Region</b>                |      |      |       |       |      |      |
| <b>Central</b>               | 0.89 | 0.19 | -0.56 | 0.573 | 0.58 | 1.35 |
| <b>Western</b>               | 0.77 | 0.13 | -1.51 | 0.130 | 0.55 | 1.08 |
| <b>North-east</b>            | 0.50 | 0.23 | -1.52 | 0.128 | 0.20 | 1.22 |
| <b>_cons</b>                 | 1.11 | 0.45 | 0.26  | 0.793 | 0.50 | 2.45 |

Note: UEMI=Urban Employee Medical Insurance; URMI=Urban Resident Medical Insurance; NCMI= New Cooperative Medical Insurance; Std.Err= standard error; conf.Interval= confidence interval.

**Table 2e. univariate regression result of hypertension controlled**

| Hypertension controlled       | Odds Ratio | Std.Err | Z     | P> Z  | 95% conf. Interval |      |
|-------------------------------|------------|---------|-------|-------|--------------------|------|
| <b>Mental health disorder</b> |            |         |       |       |                    |      |
| <b>yes</b>                    | 1.03       | 0.10    | 0.32  | 0.750 | 0.85               | 1.25 |
| <b>_cons</b>                  | 0.74       | 0.05    | -4.90 | 0.000 | 0.65               | 0.83 |

Note: Std.Err= standard error; conf.Interval= confidence interval.

**Table 2f. multivariate regression result of hypertension controlled**

| Hypertension controlled       | Odds Ratio | Std.Err | Z    | P> Z  | 95% conf. Interval |      |
|-------------------------------|------------|---------|------|-------|--------------------|------|
| <b>Mental health disorder</b> |            |         |      |       |                    |      |
| <b>Yes</b>                    | 1.06       | 0.11    | 0.54 | 0.589 | 0.87               | 1.29 |

|                                      |                              |      |      |       |       |      |      |
|--------------------------------------|------------------------------|------|------|-------|-------|------|------|
| <b>Year</b>                          |                              |      |      |       |       |      |      |
|                                      | <b>2015</b>                  | 1.15 | 0.10 | 1.57  | 0.117 | 0.97 | 1.36 |
| <b>No. of physical comorbidities</b> |                              |      |      |       |       |      |      |
|                                      | <b>One</b>                   | 1.01 | 0.13 | 0.09  | 0.929 | 0.79 | 1.30 |
|                                      | <b>Two</b>                   | 1.06 | 0.14 | 0.44  | 0.661 | 0.81 | 1.38 |
|                                      | <b>Three</b>                 | 1.40 | 0.22 | 2.17  | 0.030 | 1.03 | 1.89 |
|                                      | <b>Four and more</b>         | 1.16 | 0.19 | 0.90  | 0.367 | 0.84 | 1.60 |
| <b>Gender</b>                        |                              |      |      |       |       |      |      |
|                                      | <b>Female</b>                | 0.95 | 0.09 | -0.52 | 0.601 | 0.79 | 1.15 |
| <b>Education level</b>               |                              |      |      |       |       |      |      |
|                                      | <b>Middle or high school</b> | 1.03 | 0.12 | 0.29  | 0.775 | 0.82 | 1.30 |
|                                      | <b>College or above</b>      | 1.09 | 0.27 | 0.36  | 0.716 | 0.67 | 1.77 |
| <b>Marital status</b>                |                              |      |      |       |       |      |      |
|                                      | <b>Not married</b>           | 0.82 | 0.11 | -1.39 | 0.165 | 0.63 | 1.08 |
| <b>Age</b>                           |                              |      |      |       |       |      |      |
|                                      | <b>55-64</b>                 | 0.96 | 0.12 | -0.29 | 0.769 | 0.76 | 1.23 |
|                                      | <b>65-74</b>                 | 0.73 | 0.10 | -2.21 | 0.027 | 0.56 | 0.97 |
|                                      | <b>75+</b>                   | 0.48 | 0.10 | -3.69 | 0.000 | 0.33 | 0.71 |
| <b>Consumption level</b>             |                              |      |      |       |       |      |      |
|                                      | <b>Q2</b>                    | 1.19 | 0.16 | 1.34  | 0.181 | 0.92 | 1.54 |
|                                      | <b>Q3</b>                    | 1.45 | 0.20 | 2.71  | 0.007 | 1.11 | 1.89 |
|                                      | <b>Q4</b>                    | 1.19 | 0.18 | 1.20  | 0.232 | 0.89 | 1.59 |
|                                      | <b>Q5 (most affluent)</b>    | 1.35 | 0.21 | 1.95  | 0.051 | 1.00 | 1.84 |
| <b>Insurance</b>                     |                              |      |      |       |       |      |      |
|                                      | <b>UEMI</b>                  | 1.51 | 0.49 | 1.25  | 0.210 | 0.79 | 2.86 |
|                                      | <b>URMI</b>                  | 1.76 | 0.61 | 1.63  | 0.103 | 0.89 | 3.49 |
|                                      | <b>NCMI</b>                  | 1.33 | 0.40 | 0.96  | 0.337 | 0.74 | 2.40 |
|                                      | <b>Others</b>                | 0.90 | 0.35 | -0.28 | 0.782 | 0.41 | 1.95 |
| <b>Residency</b>                     |                              |      |      |       |       |      |      |
|                                      | <b>Urban</b>                 | 1.26 | 0.25 | 1.16  | 0.247 | 0.85 | 1.87 |
|                                      | <b>Migrate</b>               | 0.90 | 0.12 | -0.80 | 0.423 | 0.69 | 1.17 |
| <b>No. of outpatient visit</b>       |                              | 1.03 | 0.03 | 0.98  | 0.325 | 0.97 | 1.09 |
| <b>Region</b>                        |                              |      |      |       |       |      |      |
|                                      | <b>Central</b>               | 0.88 | 0.14 | -0.78 | 0.436 | 0.65 | 1.20 |
|                                      | <b>Western</b>               | 1.03 | 0.13 | 0.21  | 0.834 | 0.80 | 1.31 |
|                                      | <b>North-east</b>            | 1.06 | 0.36 | 0.16  | 0.870 | 0.54 | 2.07 |
| <b>_cons</b>                         |                              | 0.46 | 0.16 | -2.22 | 0.026 | 0.23 | 0.91 |

Note: UEMI=Urban Employee Medical Insurance; URMI=Urban Resident Medical Insurance; NCMI= New Cooperative Medical Insurance; Std.Err= standard error; conf.Interval= confidence interval.

**Table 3a. univariate regression result of diabetes awareness**

| diabetes awareness | Odds Ratio | Std.Err | Z | P> Z | 95% conf. Interval |
|--------------------|------------|---------|---|------|--------------------|
|--------------------|------------|---------|---|------|--------------------|

| <b>Mental health disorder</b> |            |      |      |      |       |      |      |
|-------------------------------|------------|------|------|------|-------|------|------|
|                               | <b>yes</b> | 2.00 | 0.39 | 3.52 | 0.000 | 1.36 | 2.94 |
| <b>_cons</b>                  |            | 1.14 | 0.14 | 1.04 | 0.298 | 0.89 | 1.45 |

Note: Std.Err= standard error; conf.Interval= confidence interval.

**Table 3b. multivariate regression result of diabetes awareness**

| <b>diabetes awareness</b>            |                              | <b>Odds Ratio</b> | <b>Std.Err</b> | <b>Z</b> | <b>P&gt; Z </b> | <b>95% conf. Interval</b> |        |
|--------------------------------------|------------------------------|-------------------|----------------|----------|-----------------|---------------------------|--------|
| <b>Mental health disorder</b>        |                              |                   |                |          |                 |                           |        |
|                                      | <b>Yes</b>                   | 1.29              | 0.34           | 0.95     | 0.341           | 0.77                      | 2.16   |
| <b>Year</b>                          |                              |                   |                |          |                 |                           |        |
|                                      | <b>2015</b>                  | 13.84             | 4.26           | 8.52     | 0.000           | 7.56                      | 25.31  |
| <b>No. of physical comorbidities</b> |                              |                   |                |          |                 |                           |        |
|                                      | <b>One</b>                   | 2.33              | 0.81           | 2.43     | 0.015           | 1.18                      | 4.60   |
|                                      | <b>Two</b>                   | 5.63              | 2.15           | 4.52     | 0.000           | 2.66                      | 11.92  |
|                                      | <b>Three</b>                 | 18.62             | 8.72           | 6.24     | 0.000           | 7.44                      | 46.65  |
|                                      | <b>Four and more</b>         | 54.27             | 30.97          | 7.00     | 0.000           | 17.73                     | 166.11 |
| <b>Gender</b>                        |                              |                   |                |          |                 |                           |        |
|                                      | <b>Female</b>                | 2.64              | 0.70           | 3.66     | 0.000           | 1.57                      | 4.44   |
| <b>Education level</b>               |                              |                   |                |          |                 |                           |        |
|                                      | <b>Middle or high school</b> | 1.25              | 0.38           | 0.73     | 0.463           | 0.69                      | 2.27   |
|                                      | <b>College or above</b>      | 2.11              | 1.30           | 1.21     | 0.226           | 0.63                      | 7.04   |
| <b>Marital status</b>                |                              |                   |                |          |                 |                           |        |
|                                      | <b>Not married</b>           | 0.67              | 0.26           | -1.02    | 0.306           | 0.32                      | 1.43   |
| <b>Age</b>                           |                              |                   |                |          |                 |                           |        |
|                                      | <b>55-64</b>                 | 1.58              | 0.47           | 1.55     | 0.121           | 0.89                      | 2.83   |
|                                      | <b>65-74</b>                 | 1.71              | 0.61           | 1.51     | 0.132           | 0.85                      | 3.44   |
|                                      | <b>75+</b>                   | 1.13              | 0.58           | 0.24     | 0.808           | 0.41                      | 3.11   |
| <b>Consumption level</b>             |                              |                   |                |          |                 |                           |        |
|                                      | <b>Q2</b>                    | 1.77              | 0.61           | 1.66     | 0.096           | 0.90                      | 3.46   |
|                                      | <b>Q3</b>                    | 1.68              | 0.60           | 1.45     | 0.147           | 0.83                      | 3.38   |
|                                      | <b>Q4</b>                    | 2.01              | 0.75           | 1.86     | 0.063           | 0.96                      | 4.19   |
|                                      | <b>Q5 (most affluent)</b>    | 2.51              | 1.01           | 2.29     | 0.022           | 1.14                      | 5.52   |
| <b>Insurance</b>                     |                              |                   |                |          |                 |                           |        |
|                                      | <b>UEMI</b>                  | 1.25              | 0.90           | 0.32     | 0.751           | 0.31                      | 5.09   |
|                                      | <b>URMI</b>                  | 0.69              | 0.52           | -0.49    | 0.626           | 0.16                      | 3.06   |
|                                      | <b>NCMI</b>                  | 0.57              | 0.34           | -0.95    | 0.344           | 0.17                      | 1.84   |
|                                      | <b>Others</b>                | 1.24              | 1.10           | 0.24     | 0.811           | 0.22                      | 7.02   |
| <b>Residency</b>                     |                              |                   |                |          |                 |                           |        |
|                                      | <b>Urban</b>                 | 2.51              | 1.28           | 1.81     | 0.071           | 0.93                      | 6.82   |
|                                      | <b>Migrate</b>               | 1.49              | 0.52           | 1.15     | 0.250           | 0.75                      | 2.95   |
| <b>No. of outpatient visit</b>       |                              |                   |                |          |                 |                           |        |
|                                      |                              | 1.29              | 0.11           | 2.89     | 0.004           | 1.08                      | 1.52   |
| <b>Region</b>                        |                              |                   |                |          |                 |                           |        |
|                                      | <b>Central</b>               | 0.46              | 0.20           | -1.78    | 0.075           | 0.19                      | 1.08   |

|                   |      |      |       |       |       |       |
|-------------------|------|------|-------|-------|-------|-------|
| <b>Western</b>    | 0.49 | 0.16 | -2.13 | 0.033 | 0.26  | 0.94  |
| <b>North-east</b> | 1.72 | 1.70 | 0.55  | 0.583 | 0.25  | 11.92 |
| <b>_cons</b>      | 0.03 | 0.02 | -4.34 | 0.000 | 0.005 | 0.14  |

Note: UEMI=Urban Employee Medical Insurance; URMI=Urban Resident Medical Insurance; NCMI= New Cooperative Medical Insurance; Std.Err= standard error; conf.Interval= confidence interval.

**Table 3c. univariate regression result of diabetes treated**

| Diabetes treated              | Odds Ratio | Std.Err | Z     | P> Z  | 95% conf. Interval |  |
|-------------------------------|------------|---------|-------|-------|--------------------|--|
| <b>Mental health disorder</b> |            |         |       |       |                    |  |
| yes                           | 0.97       | 0.23    | -0.14 | 0.888 | 0.60 1.55          |  |
| <b>_cons</b>                  | 4.44       | 0.98    | 6.74  | 0.000 | 2.88 6.85          |  |

Note: Std.Err= standard error; conf.Interval= confidence interval.

**Table 3d. multivariate regression result of diabetes treated**

| Diabetes treated                     | Odds Ratio | Std.Err | Z     | P> Z  | 95% conf. Interval |  |
|--------------------------------------|------------|---------|-------|-------|--------------------|--|
| <b>Mental health disorder</b>        |            |         |       |       |                    |  |
| Yes                                  | 0.92       | 0.24    | -0.31 | 0.759 | 0.55 1.54          |  |
| <b>Year</b>                          |            |         |       |       |                    |  |
| 2015                                 | 1.28       | 0.29    | 1.10  | 0.272 | 0.82 1.99          |  |
| <b>No. of physical comorbidities</b> |            |         |       |       |                    |  |
| One                                  | 0.57       | 0.23    | -1.39 | 0.163 | 0.25 1.26          |  |
| Two                                  | 0.71       | 0.29    | -0.83 | 0.404 | 0.32 1.58          |  |
| Three                                | 0.89       | 0.37    | -0.28 | 0.781 | 0.39 2.01          |  |
| Four and more                        | 0.82       | 0.34    | -0.47 | 0.636 | 0.36 1.87          |  |
| <b>Gender</b>                        |            |         |       |       |                    |  |
| Female                               | 0.80       | 0.21    | -0.84 | 0.398 | 0.48 1.34          |  |
| <b>Education level</b>               |            |         |       |       |                    |  |
| Middle or high school                | 0.65       | 0.20    | -1.38 | 0.166 | 0.36 1.19          |  |
| College or above                     | 0.70       | 0.40    | -0.62 | 0.533 | 0.23 2.16          |  |
| <b>Marital status</b>                |            |         |       |       |                    |  |
| Not married                          | 1.08       | 0.42    | 0.20  | 0.839 | 0.50 2.33          |  |
| <b>Age</b>                           |            |         |       |       |                    |  |
| 55-64                                | 1.56       | 0.49    | 1.43  | 0.152 | 0.85 2.87          |  |
| 65-74                                | 1.15       | 0.42    | 0.38  | 0.704 | 0.56 2.34          |  |
| 75+                                  | 1.02       | 0.53    | 0.04  | 0.972 | 0.36 2.85          |  |
| <b>Consumption level</b>             |            |         |       |       |                    |  |
| Q2                                   | 0.90       | 0.33    | -0.28 | 0.777 | 0.45 1.83          |  |
| Q3                                   | 0.76       | 0.28    | -0.75 | 0.452 | 0.37 1.55          |  |
| Q4                                   | 1.57       | 0.61    | 1.16  | 0.248 | 0.73 3.38          |  |
| Q5 (most affluent)                   | 0.91       | 0.36    | -0.25 | 0.801 | 0.42 1.96          |  |
| <b>Insurance</b>                     |            |         |       |       |                    |  |

|                                |      |      |       |       |      |       |
|--------------------------------|------|------|-------|-------|------|-------|
| <b>UEMI</b>                    | 0.59 | 0.47 | -0.66 | 0.510 | 0.12 | 2.82  |
| <b>URMI</b>                    | 0.46 | 0.38 | -0.94 | 0.348 | 0.09 | 2.33  |
| <b>NCMI</b>                    | 0.47 | 0.34 | -1.06 | 0.291 | 0.11 | 1.92  |
| <b>Others</b>                  | 2.01 | 2.07 | 0.68  | 0.497 | 0.27 | 15.07 |
| <b>Residency</b>               |      |      |       |       |      |       |
| <b>Urban</b>                   | 1.51 | 0.75 | 0.83  | 0.406 | 0.57 | 4.01  |
| <b>Migrate</b>                 | 1.29 | 0.44 | 0.75  | 0.452 | 0.66 | 2.53  |
| <b>No. of outpatient visit</b> | 1.07 | 0.08 | 1.01  | 0.315 | 0.93 | 1.24  |
| <b>Region</b>                  |      |      |       |       |      |       |
| <b>Central</b>                 | 1.30 | 0.54 | 0.63  | 0.526 | 0.58 | 2.94  |
| <b>Western</b>                 | 1.01 | 0.30 | 0.03  | 0.977 | 0.56 | 1.82  |
| <b>North-east</b>              | 0.98 | 0.80 | -0.03 | 0.977 | 0.20 | 4.89  |
| <b>_cons</b>                   | 8.12 | 7.28 | 2.34  | 0.019 | 1.40 | 47.07 |

Note: UEMI=Urban Employee Medical Insurance; URMI=Urban Resident Medical Insurance; NCMI= New Cooperative Medical Insurance; Std.Err= standard error; conf.Interval= confidence interval

**Table 3e. univariate regression result of diabetes controlled**

| diabetes controlled           | Odds Ratio | Std.Err | Z     | P> Z  | 95% conf. Interval |
|-------------------------------|------------|---------|-------|-------|--------------------|
| <b>Mental health disorder</b> |            |         |       |       |                    |
| <b>yes</b>                    | 1.69       | 0.42    | 2.09  | 0.037 | 1.03 2.76          |
| <b>_cons</b>                  | 0.45       | 0.08    | -4.52 | 0.000 | 0.31 0.63          |

Note: Std.Err= standard error; conf.Interval= confidence interval.

**Table 3f. multivariate regression result of diabetes controlled**

| diabetes controlled                  | Odds Ratio | Std.Err | Z     | P> Z  | 95% conf. Interval |
|--------------------------------------|------------|---------|-------|-------|--------------------|
| <b>Mental health disorder</b>        |            |         |       |       |                    |
| <b>Yes</b>                           | 1.26       | 0.32    | 0.90  | 0.367 | 0.76 2.09          |
| <b>Year</b>                          |            |         |       |       |                    |
| <b>2015</b>                          | 1.86       | 0.45    | 2.56  | 0.010 | 1.16 3.00          |
| <b>No. of physical comorbidities</b> |            |         |       |       |                    |
| <b>One</b>                           | 1.56       | 0.64    | 1.07  | 0.282 | 0.69 3.50          |
| <b>Two</b>                           | 2.80       | 1.18    | 2.46  | 0.014 | 1.23 6.38          |
| <b>Three</b>                         | 4.08       | 1.79    | 3.20  | 0.001 | 1.73 9.63          |
| <b>Four and more</b>                 | 4.22       | 1.85    | 3.28  | 0.001 | 1.79 9.96          |
| <b>Gender</b>                        |            |         |       |       |                    |
| <b>Female</b>                        | 0.91       | 0.22    | -0.40 | 0.690 | 0.56 1.47          |
| <b>Education level</b>               |            |         |       |       |                    |
| <b>Middle or high school</b>         | 1.50       | 0.44    | 1.37  | 0.171 | 0.84 2.68          |
| <b>College or above</b>              | 1.06       | 0.57    | 0.12  | 0.908 | 0.37 3.02          |
| <b>Marital status</b>                |            |         |       |       |                    |
| <b>Not married</b>                   | 1.19       | 0.46    | 0.46  | 0.645 | 0.56 2.52          |

|                          |      |      |       |       |      |       |
|--------------------------|------|------|-------|-------|------|-------|
| <b>Age</b>               |      |      |       |       |      |       |
| 55-64                    | 0.63 | 0.19 | -1.51 | 0.132 | 0.34 | 1.15  |
| 65-74                    | 0.97 | 0.35 | -0.07 | 0.941 | 0.48 | 1.97  |
| 75+                      | 0.98 | 0.50 | -0.03 | 0.973 | 0.36 | 2.67  |
| <b>Consumption level</b> |      |      |       |       |      |       |
| Q2                       | 0.71 | 0.26 | -0.95 | 0.344 | 0.35 | 1.45  |
| Q3                       | 0.57 | 0.21 | -1.50 | 0.134 | 0.27 | 1.19  |
| Q4                       | 0.91 | 0.34 | -0.26 | 0.797 | 0.44 | 1.88  |
| Q5 (most affluent)       | 1.02 | 0.40 | 0.04  | 0.964 | 0.47 | 2.21  |
| <b>Insurance</b>         |      |      |       |       |      |       |
| UEMI                     | 0.50 | 0.37 | -0.95 | 0.343 | 0.12 | 2.09  |
| URMI                     | 1.18 | 0.87 | 0.23  | 0.822 | 0.28 | 5.02  |
| NCMI                     | 0.70 | 0.47 | 0.53  | 0.595 | 0.19 | 2.62  |
| Others                   | 0.67 | 0.59 | -0.46 | 0.648 | 0.12 | 3.71  |
| <b>Residency</b>         |      |      |       |       |      |       |
| Urban                    | 0.54 | 0.25 | -1.35 | 0.177 | 0.22 | 1.33  |
| Migrate                  | 0.34 | 0.12 | -3.00 | 0.003 | 0.17 | 0.69  |
| No. of outpatient visit  | 1.01 | 0.06 | 0.21  | 0.835 | 0.90 | 1.14  |
| <b>Region</b>            |      |      |       |       |      |       |
| Central                  | 2.39 | 0.97 | 2.15  | 0.032 | 1.08 | 5.31  |
| Western                  | 1.32 | 0.39 | 0.94  | 0.348 | 0.74 | 2.34  |
| North-east               | 2.32 | 1.75 | 1.11  | 0.265 | 0.53 | 10.18 |
| <b>_cons</b>             | 0.28 | 0.23 | -1.53 | 0.127 | 0.06 | 1.43  |

Note: UEMI=Urban Employee Medical Insurance; URMI=Urban Resident Medical Insurance; NCMI= New Cooperative Medical Insurance; Std.Err= standard error; conf.Interval= confidence interval.

**Table 4a. univariate regression result of dyslipidemia awareness**

| Dyslipidemia awareness        | Odds Ratio | Std.Err | Z      | P> Z  | 95% conf. Interval |      |
|-------------------------------|------------|---------|--------|-------|--------------------|------|
| <b>Mental health disorder</b> |            |         |        |       |                    |      |
| yes                           | 2.88       | 0.38    | 7.90   | 0.000 | 2.21               | 3.74 |
| <b>_cons</b>                  | 0.10       | 0.01    | -15.60 | 0.000 | 0.08               | 0.14 |

Note: Std.Err= standard error; conf.Interval= confidence interval.

**Table 4b. multivariate regression result of dyslipidemia awareness**

| Dyslipidemia awareness               | Odds Ratio | Std.Err | Z     | P> Z  | 95% conf. Interval |       |
|--------------------------------------|------------|---------|-------|-------|--------------------|-------|
| <b>Mental health disorder</b>        |            |         |       |       |                    |       |
| Yes                                  | 2.09       | 0.33    | 4.61  | 0.000 | 1.53               | 2.86  |
| year                                 |            |         |       |       |                    |       |
| 2015                                 | 5.24       | 0.74    | 11.69 | 0.000 | 3.97               | 6.92  |
| <b>No. of physical comorbidities</b> |            |         |       |       |                    |       |
| One                                  | 4.77       | 1.01    | 7.36  | 0.000 | 3.15               | 7.23  |
| Two                                  | 16.78      | 4.16    | 11.37 | 0.000 | 10.32              | 27.29 |

|                                |        |        |        |       |        |        |
|--------------------------------|--------|--------|--------|-------|--------|--------|
| <b>Three</b>                   | 50.82  | 15.28  | 13.07  | 0.000 | 28.19  | 91.60  |
| <b>Four or more</b>            | 135.67 | 46.17  | 14.43  | 0.000 | 69.63  | 264.34 |
| <b>Gender</b>                  |        |        |        |       |        |        |
| <b>Female</b>                  | 1.33   | 0.20   | 1.90   | 0.057 | 0.99   | 1.78   |
| <b>Education level</b>         |        |        |        |       |        |        |
| <b>Middle or high school</b>   | 1.87   | 0.33   | 3.51   | 0.000 | 1.32   | 2.65   |
| <b>College or above</b>        | 5.52   | 2.06   | 4.58   | 0.000 | 2.66   | 11.46  |
| <b>Marital status</b>          |        |        |        |       |        |        |
| <b>Not married</b>             | 0.89   | 0.21   | -0.50  | 0.620 | 0.56   | 1.41   |
| <b>Age</b>                     |        |        |        |       |        |        |
| <b>55-64</b>                   | 1.41   | 0.23   | 2.04   | 0.041 | 1.01   | 1.95   |
| <b>65-74</b>                   | 1.37   | 0.28   | 1.52   | 0.128 | 0.91   | 2.04   |
| <b>75+</b>                     | 0.68   | 0.22   | -1.18  | 0.240 | 0.36   | 1.29   |
| <b>Consumption level</b>       |        |        |        |       |        |        |
| <b>Q2</b>                      | 1.15   | 0.23   | 0.69   | 0.488 | 0.78   | 1.70   |
| <b>Q3</b>                      | 0.99   | 0.21   | -0.02  | 0.980 | 0.66   | 1.50   |
| <b>Q4</b>                      | 1.37   | 0.30   | 1.45   | 0.146 | 0.90   | 2.10   |
| <b>Q5 (most affluent)</b>      | 1.65   | 0.38   | 2.19   | 0.029 | 1.05   | 2.60   |
| <b>Insurance</b>               |        |        |        |       |        |        |
| <b>UEMI</b>                    | 5.32   | 2.61   | 3.40   | 0.001 | 2.03   | 13.94  |
| <b>URMI</b>                    | 2.54   | 1.32   | 1.79   | 0.073 | 0.92   | 7.01   |
| <b>NCMI</b>                    | 2.00   | 0.88   | 1.58   | 0.114 | 0.85   | 4.75   |
| <b>Others</b>                  | 2.57   | 1.49   | 1.63   | 0.104 | 0.82   | 8.00   |
| <b>Residency</b>               |        |        |        |       |        |        |
| <b>Urban</b>                   | 2.25   | 0.72   | 2.53   | 0.011 | 1.20   | 4.23   |
| <b>Migrate</b>                 | 1.27   | 0.29   | 1.04   | 0.297 | 0.81   | 1.99   |
| <b>No. of outpatient visit</b> | 1.10   | 0.04   | 2.32   | 0.020 | 1.01   | 1.19   |
| <b>Region</b>                  |        |        |        |       |        |        |
| <b>Central</b>                 | 0.47   | 0.14   | -2.53  | 0.011 | 0.26   | 0.84   |
| <b>Western</b>                 | 0.82   | 0.19   | -0.86  | 0.387 | 0.52   | 1.29   |
| <b>North-east</b>              | 0.76   | 0.48   | -0.44  | 0.661 | 0.22   | 2.62   |
| <b>_cons</b>                   | 0.0006 | 0.0004 | -11.59 | 0.000 | 0.0002 | 0.002  |

Note: UEMI=Urban Employee Medical Insurance; URMI=Urban Resident Medical Insurance; NCMI= New Cooperative Medical Insurance; Std.Err= standard error; conf.Interval= confidence interval.

**Table 4c. univariate regression result of dyslipidemia treated**

| <b>Dyslipidemia treated</b>   | <b>Odds Ratio</b> | <b>Std.Err</b> | <b>Z</b> | <b>P&gt; Z </b> | <b>95% conf. Interval</b> |      |
|-------------------------------|-------------------|----------------|----------|-----------------|---------------------------|------|
| <b>Mental health disorder</b> |                   |                |          |                 |                           |      |
| <b>yes</b>                    | 1.74              | 0.23           | 4.10     | 0.000           | 1.33                      | 2.26 |
| <b>_cons</b>                  | 1.20              | 0.10           | 2.27     | 0.024           | 1.02                      | 1.40 |

Note: Std.Err= standard error; conf.Interval= confidence interval.

**Table 4d. multivariate regression result of dyslipidemia treated**

| <b>Dyslipidemia treated</b>          | <b>Odds Ratio</b> | <b>Std.Err</b> | <b>Z</b> | <b>P&gt; Z </b> | <b>95% conf. Interval</b> |      |
|--------------------------------------|-------------------|----------------|----------|-----------------|---------------------------|------|
| <b>Mental health disorder</b>        |                   |                |          |                 |                           |      |
| <b>Yes</b>                           | 1.28              | 0.17           | 1.85     | 0.065           | 0.98                      | 1.68 |
| <b>year</b>                          |                   |                |          |                 |                           |      |
| <b>2015</b>                          | 0.82              | 0.10           | -1.60    | 0.109           | 0.65                      | 1.04 |
| <b>No. of physical comorbidities</b> |                   |                |          |                 |                           |      |
| <b>One</b>                           | 1.95              | 0.44           | 2.96     | 0.003           | 1.25                      | 3.03 |
| <b>Two</b>                           | 2.34              | 0.52           | 3.79     | 0.000           | 1.51                      | 3.62 |
| <b>Three</b>                         | 3.17              | 0.77           | 4.75     | 0.000           | 1.97                      | 5.11 |
| <b>Four or more</b>                  | 4.49              | 1.14           | 5.90     | 0.000           | 2.72                      | 7.39 |
| <b>Gender</b>                        |                   |                |          |                 |                           |      |
| <b>Female</b>                        | 0.89              | 0.11           | -0.95    | 0.341           | 0.69                      | 1.14 |
| <b>Education level</b>               |                   |                |          |                 |                           |      |
| <b>Middle or high school</b>         | 0.76              | 0.11           | -1.89    | 0.059           | 0.57                      | 1.01 |
| <b>College or above</b>              | 0.86              | 0.22           | -0.59    | 0.553           | 0.51                      | 1.43 |
| <b>Marital status</b>                |                   |                |          |                 |                           |      |
| <b>Not married</b>                   | 0.99              | 0.20           | -0.03    | 0.979           | 0.67                      | 1.47 |
| <b>Age</b>                           |                   |                |          |                 |                           |      |
| <b>55-64</b>                         | 1.33              | 0.20           | 1.88     | 0.060           | 0.99                      | 1.78 |
| <b>65-74</b>                         | 1.04              | 0.18           | 0.22     | 0.828           | 0.74                      | 1.46 |
| <b>75+</b>                           | 0.88              | 0.26           | -0.42    | 0.673           | 0.50                      | 1.56 |
| <b>Consumption level</b>             |                   |                |          |                 |                           |      |
| <b>Q2</b>                            | 1.11              | 0.21           | 0.55     | 0.580           | 0.77                      | 1.60 |
| <b>Q3</b>                            | 1.05              | 0.20           | 0.26     | 0.798           | 0.72                      | 1.54 |
| <b>Q4</b>                            | 1.03              | 0.20           | 0.16     | 0.871           | 0.70                      | 1.51 |
| <b>Q5 (most affluent)</b>            | 1.06              | 0.21           | 0.28     | 0.780           | 0.71                      | 1.58 |
| <b>Insurance</b>                     |                   |                |          |                 |                           |      |
| <b>UEMI</b>                          | 0.70              | 0.33           | -0.78    | 0.438           | 0.28                      | 1.74 |
| <b>URMI</b>                          | 0.60              | 0.30           | -1.03    | 0.303           | 0.23                      | 1.58 |
| <b>NCMI</b>                          | 0.93              | 0.42           | -0.15    | 0.878           | 0.38                      | 2.26 |
| <b>Others</b>                        | 0.80              | 0.45           | -0.39    | 0.695           | 0.27                      | 2.39 |
| <b>Residency</b>                     |                   |                |          |                 |                           |      |
| <b>Urban</b>                         | 0.91              | 0.22           | -0.38    | 0.707           | 0.57                      | 1.46 |
| <b>Migrate</b>                       | 1.20              | 0.20           | 1.05     | 0.295           | 0.86                      | 1.67 |
| <b>No. of outpatient visit</b>       | 1.10              | 0.04           | 2.50     | 0.012           | 1.02                      | 1.18 |
| <b>Region</b>                        |                   |                |          |                 |                           |      |
| <b>Central</b>                       | 1.19              | 0.23           | 0.87     | 0.382           | 0.81                      | 1.74 |
| <b>Western</b>                       | 0.98              | 0.15           | -0.17    | 0.869           | 0.72                      | 1.31 |
| <b>North-east</b>                    | 0.68              | 0.28           | -0.94    | 0.346           | 0.31                      | 1.51 |
| <b>_cons</b>                         | 0.65              | 0.34           | -0.84    | 0.401           | 0.23                      | 1.79 |

*Note: UEMI=Urban Employee Medical Insurance; URMI=Urban Resident Medical Insurance; NCMI= New Cooperative Medical Insurance; Std.Err= standard error; conf.Interval= confidence interval.*



**Table 4e. univariate regression result of dyslipidemia controlled**

| Dyslipidemia controlled       | Odds Ratio | Std.Err | Z     | P> Z  | 95% conf. Interval |      |
|-------------------------------|------------|---------|-------|-------|--------------------|------|
| <b>Mental health disorder</b> |            |         |       |       |                    |      |
| yes                           | 1.07       | 0.22    | 0.35  | 0.729 | 0.72               | 1.60 |
| _cons                         | 0.87       | 0.11    | -1.12 | 0.265 | 0.68               | 1.11 |

Note: Std.Err= standard error; conf.Interval= confidence interval.

**Table 4f. multivariate regression result of dyslipidemia controlled**

| Dyslipidemia controlled              | Odds Ratio | Std.Err | Z     | P> Z  | 95% conf. Interval |       |
|--------------------------------------|------------|---------|-------|-------|--------------------|-------|
| <b>Mental health disorder</b>        |            |         |       |       |                    |       |
| Yes                                  | 0.93       | 0.21    | -0.30 | 0.762 | 0.60               | 1.45  |
| year                                 |            |         |       |       |                    |       |
| 2015                                 | 1.61       | 0.32    | 2.38  | 0.017 | 1.09               | 2.39  |
| <b>No. of physical comorbidities</b> |            |         |       |       |                    |       |
| One                                  | 1.00       | 0.44    | 0.00  | 1.000 | 0.42               | 2.39  |
| Two                                  | 0.96       | 0.42    | -0.10 | 0.921 | 0.41               | 2.25  |
| Three                                | 1.05       | 0.47    | 0.11  | 0.913 | 0.44               | 2.53  |
| Four and more                        | 0.75       | 0.34    | -0.64 | 0.524 | 0.31               | 1.81  |
| <b>Gender</b>                        |            |         |       |       |                    |       |
| Female                               | 1.47       | 0.33    | 1.71  | 0.087 | 0.95               | 2.27  |
| <b>Education level</b>               |            |         |       |       |                    |       |
| Middle or high school                | 1.18       | 0.31    | 0.65  | 0.514 | 0.71               | 1.97  |
| College or above                     | 1.13       | 0.54    | 0.25  | 0.806 | 0.44               | 2.90  |
| <b>Marital status</b>                |            |         |       |       |                    |       |
| Not married                          | 1.09       | 0.37    | 0.26  | 0.795 | 0.56               | 2.13  |
| <b>Age</b>                           |            |         |       |       |                    |       |
| 55-64                                | 1.11       | 0.29    | 0.40  | 0.690 | 0.67               | 1.84  |
| 64-74                                | 1.39       | 0.44    | 1.04  | 0.300 | 0.75               | 2.57  |
| 75+                                  | 1.21       | 0.64    | 0.36  | 0.722 | 0.43               | 3.40  |
| <b>Consumption level</b>             |            |         |       |       |                    |       |
| Q2                                   | 0.64       | 0.21    | -1.39 | 0.163 | 0.34               | 1.20  |
| Q3                                   | 0.52       | 0.17    | -1.96 | 0.050 | 0.27               | 1.00  |
| Q4                                   | 0.75       | 0.26    | -0.84 | 0.402 | 0.39               | 1.46  |
| Q5                                   | 0.45       | 0.16    | -2.22 | 0.027 | 0.22               | 0.91  |
| <b>Insurance</b>                     |            |         |       |       |                    |       |
| UEMI                                 | 2.76       | 2.26    | 1.24  | 0.214 | 0.56               | 13.69 |
| URMI                                 | 1.47       | 1.27    | 0.45  | 0.655 | 0.27               | 7.97  |
| NCMI                                 | 2.91       | 2.35    | 1.32  | 0.185 | 0.60               | 14.15 |
| Others                               | 2.32       | 2.26    | 0.86  | 0.388 | 0.34               | 15.62 |
| <b>Residency</b>                     |            |         |       |       |                    |       |

|                                |      |      |       |       |      |      |
|--------------------------------|------|------|-------|-------|------|------|
| <b>Urban</b>                   | 0.65 | 0.26 | -1.08 | 0.280 | 0.30 | 1.42 |
| <b>Migrate</b>                 | 0.68 | 0.19 | -1.40 | 0.161 | 0.40 | 1.16 |
| <b>No. of outpatient visit</b> | 1.00 | 0.05 | 0.06  | 0.955 | 0.91 | 1.10 |
| <b>Region</b>                  |      |      |       |       |      |      |
| <b>Central</b>                 | 1.01 | 0.30 | 0.04  | 0.970 | 0.56 | 1.82 |
| <b>Western</b>                 | 1.18 | 0.29 | 0.68  | 0.499 | 0.73 | 1.89 |
| <b>North-east</b>              | 0.84 | 0.53 | -0.28 | 0.779 | 0.24 | 2.93 |
| <b>_cons</b>                   | 0.31 | 0.30 | -1.23 | 0.219 | 0.05 | 2.01 |

Note: UEMI=Urban Employee Medical Insurance; URMI=Urban Resident Medical Insurance; NCMI= New Cooperative Medical Insurance; Std.Err= standard error; conf.Interval= confidence interval.

**Table 5a. univariate regression result of kidney disease awareness**

| <b>Kidney disease awareness</b> | <b>Odds Ratio</b> | <b>Std.Err</b> | <b>Z</b> | <b>P&gt; Z </b> | <b>95% conf. Interval</b> |       |
|---------------------------------|-------------------|----------------|----------|-----------------|---------------------------|-------|
| <b>Mental health disorder</b>   |                   |                |          |                 |                           |       |
| <b>yes</b>                      | 4.14              | 0.71           | 8.23     | 0.000           | 2.95                      | 5.81  |
| <b>_cons</b>                    | 0.003             | 0.0009         | -18.23   | 0.000           | 0.001                     | 0.005 |

Note: Std.Err= standard error; conf.Interval= confidence interval.

**Table 5b. multivariate regression result of kidney disease awareness**

| <b>Kidney disease awareness</b>      | <b>Odds Ratio</b> | <b>Std.Err</b> | <b>Z</b> | <b>P&gt; Z </b> | <b>95% conf. Interval</b> |        |
|--------------------------------------|-------------------|----------------|----------|-----------------|---------------------------|--------|
| <b>Mental health disorder</b>        |                   |                |          |                 |                           |        |
| <b>Yes</b>                           | 3.02              | 0.53           | 6.34     | 0.000           | 2.15                      | 4.25   |
| <b>Year</b>                          |                   |                |          |                 |                           |        |
| <b>2015</b>                          | 0.90              | 0.12           | -0.79    | 0.430           | 0.69                      | 1.17   |
| <b>No. of physical comorbidities</b> |                   |                |          |                 |                           |        |
| <b>One</b>                           | 2.88              | 0.66           | 4.61     | 0.000           | 1.84                      | 4.50   |
| <b>Two</b>                           | 6.78              | 1.67           | 7.79     | 0.000           | 4.19                      | 10.99  |
| <b>Three</b>                         | 17.73             | 5.26           | 9.70     | 0.000           | 9.92                      | 31.70  |
| <b>Four or more</b>                  | 78.06             | 25.49          | 13.35    | 0.000           | 41.16                     | 148.04 |
| <b>Gender</b>                        |                   |                |          |                 |                           |        |
| <b>Female</b>                        | 0.31              | 0.06           | -6.57    | 0.000           | 0.22                      | 0.44   |
| <b>Education level</b>               |                   |                |          |                 |                           |        |
| <b>Middle or high school</b>         | 1.14              | 0.24           | 0.62     | 0.534           | 0.76                      | 1.71   |
| <b>College or above</b>              | 0.79              | 0.37           | -0.50    | 0.616           | 0.31                      | 1.99   |
| <b>Marital status</b>                |                   |                |          |                 |                           |        |
| <b>Not married</b>                   | 0.60              | 0.16           | -1.94    | 0.053           | 0.36                      | 1.01   |
| <b>Age</b>                           |                   |                |          |                 |                           |        |
| <b>55-64</b>                         | 0.56              | 0.11           | -2.94    | 0.003           | 0.38                      | 0.82   |
| <b>65-74</b>                         | 0.33              | 0.08           | -4.62    | 0.000           | 0.21                      | 0.53   |
| <b>75+</b>                           | 0.26              | 0.09           | -3.95    | 0.000           | 0.13                      | 0.50   |
| <b>Consumption level</b>             |                   |                |          |                 |                           |        |

|                                |       |        |        |       |        |       |
|--------------------------------|-------|--------|--------|-------|--------|-------|
| <b>Q2</b>                      | 1.21  | 0.27   | 0.84   | 0.399 | 0.78   | 1.87  |
| <b>Q3</b>                      | 1.07  | 0.24   | 0.28   | 0.780 | 0.68   | 1.67  |
| <b>Q4</b>                      | 0.99  | 0.24   | -0.06  | 0.953 | 0.61   | 1.59  |
| <b>Q5 (most affluent)</b>      | 1.63  | 0.42   | 1.89   | 0.058 | 0.98   | 2.69  |
| <b>Insurance</b>               |       |        |        |       |        |       |
| <b>UEMI</b>                    | 2.97  | 1.74   | 1.86   | 0.063 | 0.94   | 9.38  |
| <b>URMI</b>                    | 5.37  | 3.33   | 2.71   | 0.007 | 1.59   | 18.11 |
| <b>NCMI</b>                    | 2.36  | 1.21   | 1.67   | 0.096 | 0.86   | 6.46  |
| <b>Others</b>                  | 2.77  | 1.89   | 1.50   | 0.134 | 0.73   | 10.53 |
| <b>Residency</b>               |       |        |        |       |        |       |
| <b>Urban</b>                   | 0.56  | 0.19   | -1.67  | 0.095 | 0.29   | 1.11  |
| <b>Migrate</b>                 | 0.84  | 0.18   | -0.85  | 0.393 | 0.55   | 1.26  |
| <b>No. of outpatient visit</b> | 1.17  | 0.05   | 3.38   | 0.001 | 1.07   | 1.28  |
| <b>Region</b>                  |       |        |        |       |        |       |
| <b>Central</b>                 | 2.00  | 0.62   | 2.21   | 0.027 | 1.08   | 3.68  |
| <b>Western</b>                 | 0.92  | 0.23   | -0.35  | 0.727 | 0.56   | 1.50  |
| <b>North-east</b>              | 2.30  | 1.29   | 1.49   | 0.136 | 0.77   | 6.88  |
| <b>_cons</b>                   | 0.001 | 0.0005 | -10.86 | 0.000 | 0.0002 | 0.003 |

Note: UEMI=Urban Employee Medical Insurance; URMI=Urban Resident Medical Insurance; NCMI= New Cooperative Medical Insurance; Std.Err= standard error; conf.Interval= confidence interval.

**Table 5c. univariate regression result of kidney disease treated**

| <b>Kidney disease treated</b> | <b>Odds Ratio</b> | <b>Std.Err</b> | <b>Z</b> | <b>P&gt; Z </b> | <b>95% conf. Interval</b> |      |
|-------------------------------|-------------------|----------------|----------|-----------------|---------------------------|------|
| <b>Mental health disorder</b> |                   |                |          |                 |                           |      |
| <b>yes</b>                    | 1.50              | 0.24           | 2.50     | 0.012           | 1.09                      | 2.05 |
| <b>_cons</b>                  | 0.93              | 0.10           | -0.72    | 0.474           | 0.76                      | 1.14 |

Note: Std.Err= standard error; conf.Interval= confidence interval.

**Table 5d. multivariate regression result of kidney disease treated**

| <b>Kidney disease treated</b>        | <b>Odds Ratio</b> | <b>Std.Err</b> | <b>Z</b> | <b>P&gt; Z </b> | <b>95% conf. Interval</b> |      |
|--------------------------------------|-------------------|----------------|----------|-----------------|---------------------------|------|
| <b>Mental health disorder</b>        |                   |                |          |                 |                           |      |
| <b>Yes</b>                           | 1.34              | 0.22           | 1.72     | 0.086           | 0.96                      | 1.86 |
| <b>Year</b>                          |                   |                |          |                 |                           |      |
| <b>2015</b>                          | 0.81              | 0.12           | -1.35    | 0.177           | 0.60                      | 1.10 |
| <b>No. of physical comorbidities</b> |                   |                |          |                 |                           |      |
| <b>One</b>                           | 1.57              | 0.44           | 1.60     | 0.109           | 0.90                      | 2.74 |
| <b>Two</b>                           | 1.65              | 0.47           | 1.77     | 0.076           | 0.95                      | 2.87 |
| <b>Three</b>                         | 1.41              | 0.42           | 1.13     | 0.257           | 0.78                      | 2.54 |
| <b>Four or more</b>                  | 1.85              | 0.54           | 2.11     | 0.035           | 1.05                      | 3.26 |
| <b>Gender</b>                        |                   |                |          |                 |                           |      |
| <b>Female</b>                        | 0.87              | 0.14           | -0.87    | 0.382           | 0.63                      | 1.19 |

|                          |      |      |       |       |      |      |
|--------------------------|------|------|-------|-------|------|------|
| <b>Education level</b>   |      |      |       |       |      |      |
| Middle or high school    | 1.27 | 0.24 | 1.26  | 0.206 | 0.88 | 1.84 |
| College or above         | 1.41 | 0.63 | 0.77  | 0.443 | 0.59 | 3.37 |
| <b>Marital status</b>    |      |      |       |       |      |      |
| Not married              | 1.46 | 0.38 | 1.45  | 0.146 | 0.88 | 2.42 |
| <b>Age</b>               |      |      |       |       |      |      |
| 55-64                    | 1.03 | 0.19 | 0.16  | 0.873 | 0.71 | 1.49 |
| 65-74                    | 0.97 | 0.22 | -0.12 | 0.902 | 0.62 | 1.52 |
| 75+                      | 0.86 | 0.30 | -0.44 | 0.661 | 0.44 | 1.69 |
| <b>Consumption level</b> |      |      |       |       |      |      |
| Q2                       | 1.25 | 0.29 | 0.97  | 0.330 | 0.80 | 1.97 |
| Q3                       | 1.04 | 0.25 | 0.17  | 0.866 | 0.65 | 1.66 |
| Q4                       | 0.99 | 0.25 | -0.04 | 0.965 | 0.60 | 1.62 |
| Q5 (most affluent)       | 1.55 | 0.40 | 1.70  | 0.090 | 0.93 | 2.56 |
| <b>Insurance</b>         |      |      |       |       |      |      |
| UEMI                     | 1.27 | 0.77 | 0.39  | 0.697 | 0.39 | 4.16 |
| URMI                     | 2.40 | 1.55 | 1.36  | 0.175 | 0.68 | 8.54 |
| NCMI                     | 1.88 | 1.04 | 1.14  | 0.253 | 0.64 | 5.53 |
| others                   | 2.30 | 1.65 | 1.16  | 0.248 | 0.56 | 9.42 |
| <b>Residency</b>         |      |      |       |       |      |      |
| Urban                    | 0.78 | 0.26 | -0.75 | 0.453 | 0.41 | 1.49 |
| Migrate                  | 1.36 | 0.28 | 1.48  | 0.139 | 0.91 | 2.03 |
| No. of outpatient visit  | 1.04 | 0.04 | 1.00  | 0.319 | 0.96 | 1.12 |
| <b>Region</b>            |      |      |       |       |      |      |
| Central                  | 2.51 | 0.60 | 3.86  | 0.000 | 1.57 | 4.00 |
| Western                  | 1.51 | 0.30 | 2.10  | 0.036 | 1.03 | 2.22 |
| North-east               | 1.15 | 0.52 | 0.32  | 0.751 | 0.48 | 2.79 |
| _cons                    | 0.20 | 0.13 | -2.46 | 0.014 | 0.06 | 0.72 |

Note: UEMI=Urban Employee Medical Insurance; URMI=Urban Resident Medical Insurance; NCMI= New Cooperative Medical Insurance; Std.Err= standard error; conf.Interval= confidence interval.

**Table 5e. univariate regression result of kidney disease controlled**

| Kidney disease controlled     | Odds Ratio | Std.Err | Z     | P> Z  | 95% conf. Interval |
|-------------------------------|------------|---------|-------|-------|--------------------|
| <b>Mental health disorder</b> |            |         |       |       |                    |
| yes                           | 1.21       | 0.36    | 0.64  | 0.523 | 0.67 2.18          |
| _cons                         | 0.60       | 0.14    | -2.17 | 0.030 | 0.38 0.95          |

Note: Std.Err= standard error; conf.Interval= confidence interval.

**Table 5f. multivariate regression result of kidney disease controlled**

| Kidney disease controlled     | Odds Ratio | Std.Err | Z | P> Z | 95% conf. Interval |
|-------------------------------|------------|---------|---|------|--------------------|
| <b>Mental health disorder</b> |            |         |   |      |                    |

|                                      |                              |      |      |       |       |      |       |
|--------------------------------------|------------------------------|------|------|-------|-------|------|-------|
| <b>Year</b>                          | <b>Yes</b>                   | 1.03 | 0.32 | 0.10  | 0.918 | 0.57 | 1.88  |
|                                      | <b>2015</b>                  | 0.85 | 0.23 | -0.58 | 0.559 | 0.50 | 1.45  |
| <b>No. of physical comorbidities</b> | <b>One</b>                   | 0.77 | 0.42 | -0.48 | 0.628 | 0.27 | 2.22  |
|                                      | <b>Two</b>                   | 0.63 | 0.34 | -0.85 | 0.398 | 0.22 | 1.83  |
|                                      | <b>Three</b>                 | 1.11 | 0.64 | 0.18  | 0.856 | 0.36 | 3.44  |
|                                      | <b>Four or more</b>          | 1.03 | 0.56 | 0.05  | 0.963 | 0.35 | 3.00  |
| <b>Gender</b>                        | <b>Female</b>                | 1.13 | 0.34 | 0.42  | 0.674 | 0.63 | 2.04  |
| <b>Education level</b>               | <b>Middle or high school</b> | 0.95 | 0.33 | -0.16 | 0.874 | 0.48 | 1.86  |
|                                      | <b>College or above</b>      | 2.86 | 2.53 | 1.18  | 0.237 | 0.50 | 16.24 |
| <b>Marital status</b>                | <b>Not married</b>           | 1.67 | 0.77 | 1.11  | 0.265 | 0.68 | 4.11  |
| <b>Age</b>                           | <b>55-64</b>                 | 0.45 | 0.17 | -2.13 | 0.033 | 0.22 | 0.94  |
|                                      | <b>64-74</b>                 | 0.20 | 0.10 | -3.22 | 0.001 | 0.08 | 0.53  |
|                                      | <b>75+</b>                   | 0.07 | 0.06 | -3.20 | 0.001 | 0.01 | 0.35  |
| <b>Consumption level</b>             | <b>Q2</b>                    | 0.58 | 0.26 | -1.21 | 0.226 | 0.24 | 1.40  |
|                                      | <b>Q3</b>                    | 0.77 | 0.34 | -0.59 | 0.555 | 0.32 | 1.84  |
|                                      | <b>Q4</b>                    | 0.52 | 0.26 | -1.30 | 0.194 | 0.20 | 1.39  |
|                                      | <b>Q5 (most affluent)</b>    | 0.40 | 0.20 | -1.79 | 0.073 | 0.15 | 1.09  |
| <b>Insurance</b>                     | <b>UEMI</b>                  | 1.42 | 1.72 | 0.29  | 0.772 | 0.13 | 15.29 |
|                                      | <b>URMI</b>                  | 3.02 | 3.81 | 0.88  | 0.379 | 0.26 | 35.67 |
|                                      | <b>NCMI</b>                  | 1.64 | 1.71 | 0.48  | 0.633 | 0.21 | 12.70 |
|                                      | <b>others</b>                | 2.03 | 2.79 | 0.52  | 0.605 | 0.14 | 29.91 |
| <b>Residency</b>                     | <b>Urban</b>                 | 0.79 | 0.50 | -0.37 | 0.711 | 0.23 | 2.76  |
|                                      | <b>Migrate</b>               | 0.90 | 0.34 | -0.28 | 0.779 | 0.42 | 1.90  |
| <b>No. of outpatient visit</b>       |                              | 0.97 | 0.08 | -0.41 | 0.681 | 0.83 | 1.13  |
| <b>Region</b>                        | <b>Central</b>               | 1.31 | 0.59 | 0.60  | 0.547 | 0.54 | 3.18  |
|                                      | <b>Western</b>               | 0.82 | 0.33 | -0.50 | 0.616 | 0.37 | 1.81  |
|                                      | <b>North-east</b>            | 1.20 | 1.12 | 0.20  | 0.845 | 0.19 | 7.42  |
| <b>_cons</b>                         |                              | 1.88 | 2.30 | 0.51  | 0.607 | 0.17 | 20.66 |

Note: UEMI=Urban Employee Medical Insurance; URMI=Urban Resident Medical Insurance; NCMI= New Cooperative Medical Insurance; Std.Err= standard error; conf.Interval= confidence interval.
